# Supplementary material
Source: Research Square preprint supplement (doi:10.21203/rs.3.rs-9324746/v1)
Supplement: Supplementary file 1 [file 5c8c88b710ab5b6a9a986d69.pdf]

## Supplementary Information

**Supplementary Table 1** Statistics of the curated ChEMBL36 activity datasets used in this study.

| Dataset version | Task           | # Activities | # Targets | # Molecules | # Mixed-label molecules |
|-----------------|----------------|--------------|-----------|-------------|-------------------------|
| Unaugmented     | Classification | 662,770      | 6,608     | 514,612     | 12,140                  |
| Unaugmented     | Regression     | 353,594      | 4,975     | 196,623     | /                       |
| Augmented       | Classification | 1,170,590    | 6,608     | 514,612     | 403,623                 |
| Augmented       | Regression     | 521,566      | 4,975     | 196,623     | /                       |

**Note:** Mixed-label molecules refer to the number of unique molecules that are associated with both positive and negative labels across different targets or assays.

**Supplementary Table 2** Performance comparison on the benchmark DUD-E. Values are reported as mean/median across targets. (All models are retrained from scratch)

| Method           | EF0.1%       |              | EF0.5%       |              | EF1%         |              | EF5%         |              | AUROC        |              | BEDROC       |              |
|------------------|--------------|--------------|--------------|--------------|--------------|--------------|--------------|--------------|--------------|--------------|--------------|--------------|
|                  | Mean         | Med.         |
| GraphDTA [1]     | 4.42         | 0.00         | 3.15         | 0.84         | 2.64         | 1.06         | 1.86         | 1.23         | 0.537        | 0.627        | 0.051        | 0.026        |
| MGraphDTA [2]    | 13.09        | 4.32         | 10.96        | 5.03         | 9.63         | 5.39         | 5.12         | 3.68         | 0.672        | 0.671        | 0.170        | 0.117        |
| PSICHIC [3]      | 16.29        | 8.70         | 13.45        | 7.83         | 11.54        | 8.90         | 6.44         | 5.89         | 0.758        | 0.795        | 0.209        | 0.176        |
| DeepDTAGen [4]   | 5.98         | 0.00         | 4.91         | 1.66         | 4.37         | 1.98         | 3.05         | 2.00         | 0.590        | 0.605        | 0.085        | 0.044        |
| DrugBAN [5]      | 12.37        | 0.00         | 10.45        | 4.25         | 8.68         | 3.93         | 4.61         | 3.49         | 0.682        | 0.723        | 0.157        | 0.081        |
| MCANet [6]       | 32.52        | 34.74        | 26.08        | 20.64        | 21.60        | 15.33        | 8.33         | 7.35         | 0.742        | 0.782        | 0.350        | 0.258        |
| HitScreen [7]    | 14.77        | 6.51         | 11.02        | 4.30         | 9.55         | 4.45         | 4.95         | 3.62         | 0.708        | 0.722        | 0.170        | 0.095        |
| ColdstartCPI [8] | 33.02        | 38.61        | 27.98        | 25.42        | 22.79        | 18.61        | 9.20         | 9.27         | 0.813        | 0.865        | 0.377        | 0.350        |
| ReqVS-ESA        | 22.33        | 14.23        | 15.50        | 10.23        | 12.52        | 7.54         | 5.92         | 5.18         | 0.724        | 0.750        | 0.216        | 0.147        |
| ReqVS-EPA        | 22.48        | 15.75        | 16.28        | 10.65        | 13.02        | 7.78         | 6.16         | 5.47         | 0.727        | 0.754        | 0.225        | 0.161        |
| ReqVS-ESI        | 38.43        | 41.00        | 31.74        | 28.28        | 26.99        | 22.79        | 10.19        | <b>11.58</b> | 0.806        | 0.866        | 0.437        | 0.418        |
| ReqVS-EPI        | 39.68        | 43.41        | 32.51        | 30.81        | 27.25        | 23.07        | 10.04        | 11.49        | 0.798        | 0.857        | 0.440        | 0.423        |
| ReqVS-ES         | 41.64        | 51.62        | 33.51        | 32.59        | 28.16        | 25.33        | <b>10.43</b> | 11.40        | <b>0.821</b> | 0.866        | 0.454        | 0.465        |
| ReqVS            | <b>42.65</b> | <b>52.38</b> | <b>34.29</b> | <b>35.12</b> | <b>28.58</b> | <b>27.95</b> | 10.40        | 11.44        | 0.820        | <b>0.871</b> | <b>0.459</b> | <b>0.494</b> |

**Note:** Bold values indicate the best performance in each metric.

**Supplementary Table 3** Performance comparison on the benchmark DEKOIS2.0. Values are reported as mean/median across targets. EF0.1% is not reported because the limited number of compounds per target in DEKOIS2.0 makes this metric statistically meaningless. (All models are retrained from scratch)

| Method           | EF0.5%       |              | EF1%         |              | EF5%         |              | AUROC        |              | BEDROC       |              |
|------------------|--------------|--------------|--------------|--------------|--------------|--------------|--------------|--------------|--------------|--------------|
|                  | Mean         | Med.         |
| GraphDTA [1]     | 2.68         | 0.00         | 2.26         | 0.00         | 1.67         | 1.50         | 0.558        | 0.558        | 0.069        | 0.040        |
| MGraphDTA [2]    | 7.72         | 5.17         | 7.40         | 5.17         | 4.50         | 4.00         | 0.699        | 0.735        | 0.215        | 0.154        |
| PSICHIC [3]      | 10.01        | 5.17         | 9.25         | 7.75         | 5.56         | 5.00         | 0.750        | 0.805        | 0.267        | 0.237        |
| DeepDTAGen [4]   | 3.32         | 0.00         | 3.25         | 2.58         | 2.22         | 1.50         | 0.560        | 0.559        | 0.099        | 0.066        |
| DrugBAN [5]      | 7.97         | 5.17         | 7.24         | 5.16         | 4.29         | 3.50         | 0.678        | 0.710        | 0.206        | 0.110        |
| MCANet [6]       | 15.95        | 15.50        | 14.64        | 15.50        | 8.27         | 8.00         | 0.763        | 0.851        | 0.421        | 0.414        |
| HitScreen [7]    | 6.57         | 5.17         | 6.25         | 5.17         | 4.46         | 3.50         | 0.710        | 0.744        | 0.192        | 0.141        |
| ColdstartCPI [8] | 16.90        | 15.50        | 15.72        | 15.50        | 8.53         | 9.00         | 0.814        | 0.880        | 0.442        | 0.448        |
| ReqVS-ESA        | 10.84        | 10.33        | 9.41         | 7.75         | 5.49         | 5.50         | 0.735        | 0.784        | 0.271        | 0.267        |
| ReqVS-EPA        | 11.16        | 10.33        | 9.82         | 10.33        | 5.57         | 5.00         | 0.736        | 0.788        | 0.280        | 0.266        |
| ReqVS-ESI        | 18.37        | <b>20.67</b> | 17.51        | 20.67        | 10.01        | 10.50        | 0.817        | 0.891        | 0.509        | 0.586        |
| ReqVS-EPI        | 18.56        | <b>20.67</b> | 17.64        | 20.67        | 9.93         | 10.50        | 0.814        | 0.886        | 0.513        | 0.586        |
| ReqVS-ES         | 18.24        | <b>20.67</b> | 18.12        | 20.67        | 10.24        | 11.00        | <b>0.828</b> | <b>0.890</b> | 0.527        | 0.603        |
| ReqVS            | <b>18.69</b> | <b>20.67</b> | <b>18.69</b> | <b>23.25</b> | <b>10.27</b> | <b>11.50</b> | 0.825        | 0.888        | <b>0.533</b> | <b>0.612</b> |

**Note:** Bold values indicate the best performance in each metric.

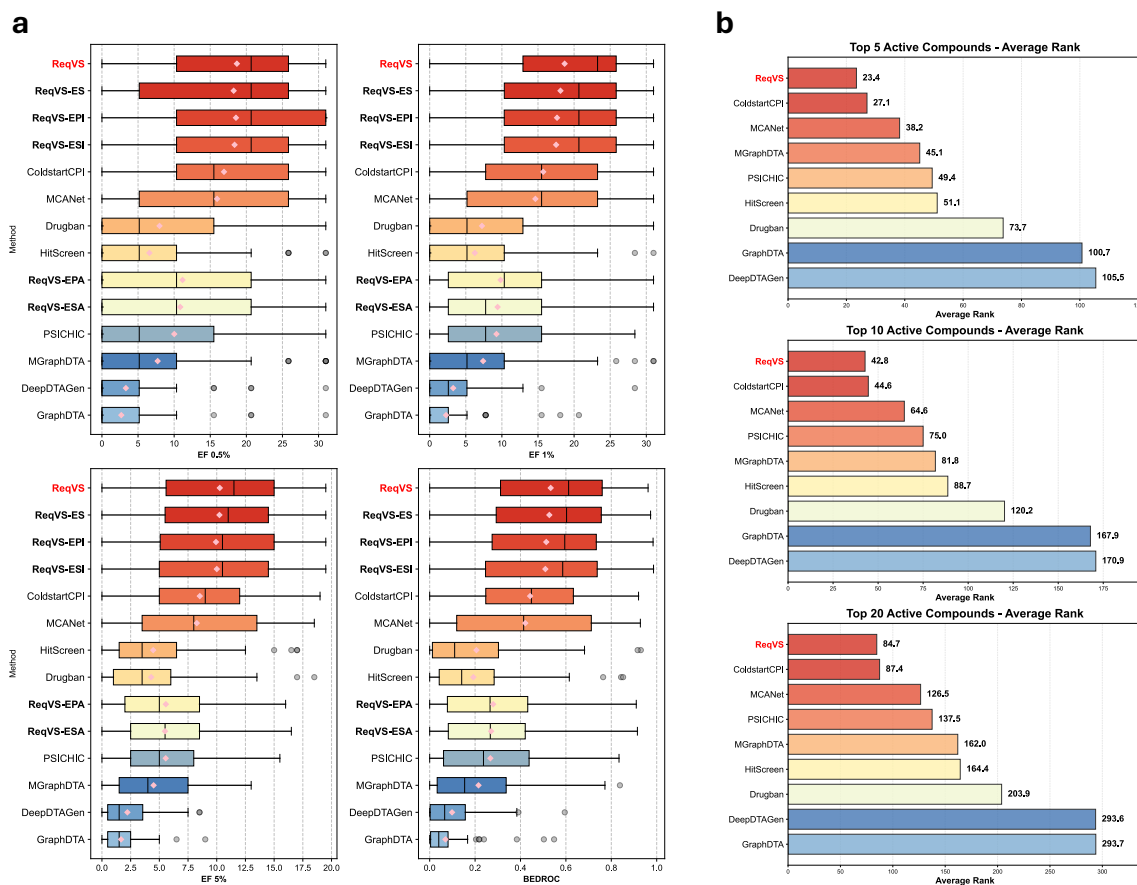

**Supplementary Figure 1** Performance evaluation and ablation study of ReqVS on the DEKOIS2.0 benchmark. **a** Comparison of ReqVS against its framework variants and single constituent models across four key metrics: EF0.5%, EF1%, EF5%, and BEDROC. EF0.1% is not reported because the limited number of compounds per target in DEKOIS2.0 makes this metric statistically meaningless. Pink diamonds denote the mean value for each metric; a median line is included in each box-whisker plot. **b** Comparison of the Average Rank for the top 5, 10, and 20 active compounds across all test targets. Lower values indicate a superior capability to prioritize active molecules at the absolute top of the screening list.

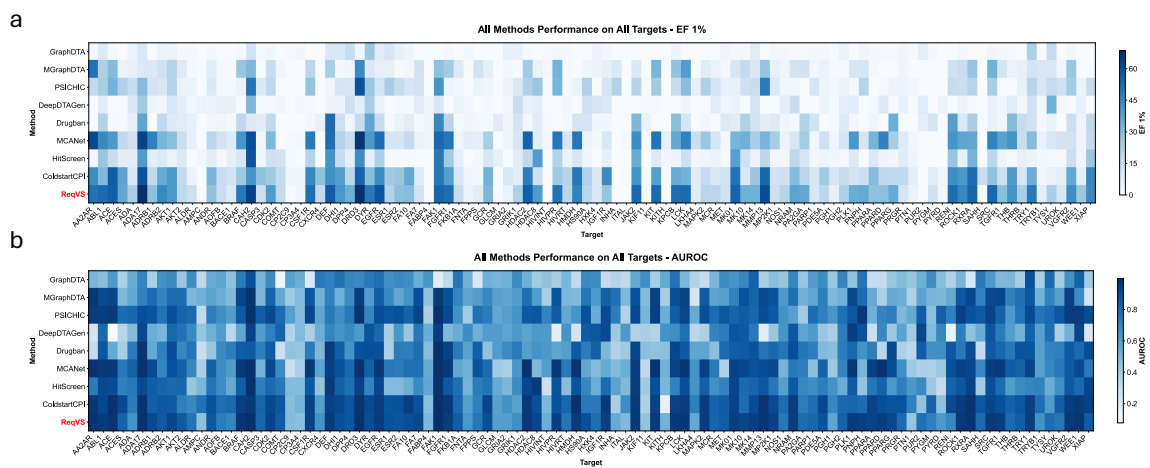

**Supplementary Figure 2** Target-wise performance heatmaps of ReqVS and 8 contained methods across all targets in the DUD-E dataset. The heatmaps across targets in terms of **a** EF1%, and **b** AUROC, respectively.

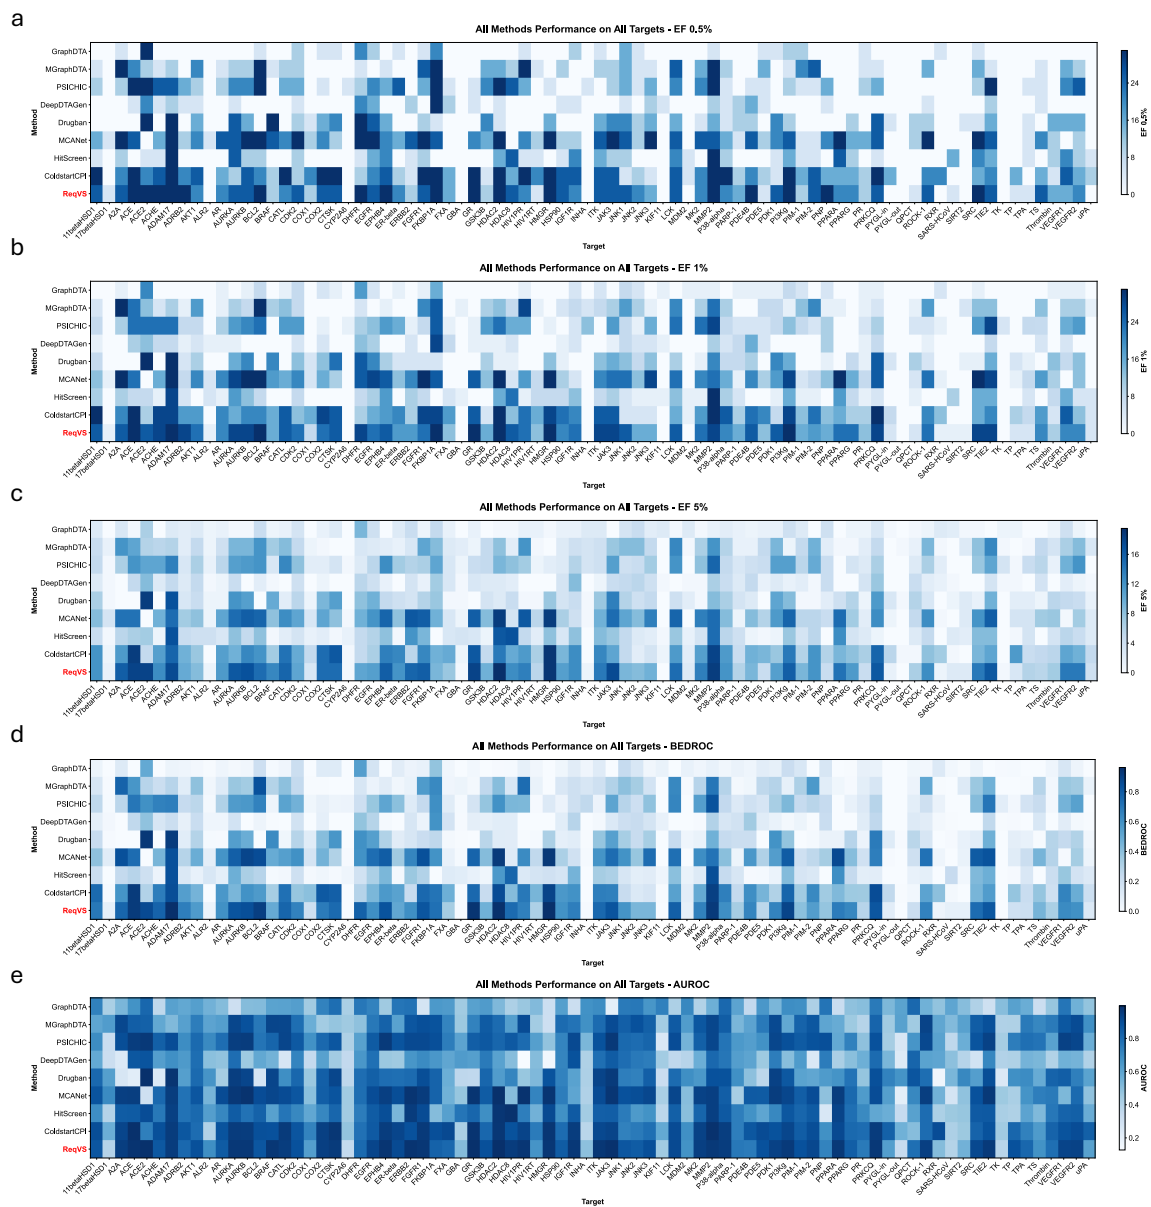

**Supplementary Figure 3 Target-wise performance heatmaps of ReqVS and 8 contained methods across all targets in the DEKOIS2.0 dataset. The heatmaps across targets in terms of a EF0.5% , b EF1% , c EF5% , d BEDROC, and e AUROC, respectively.**

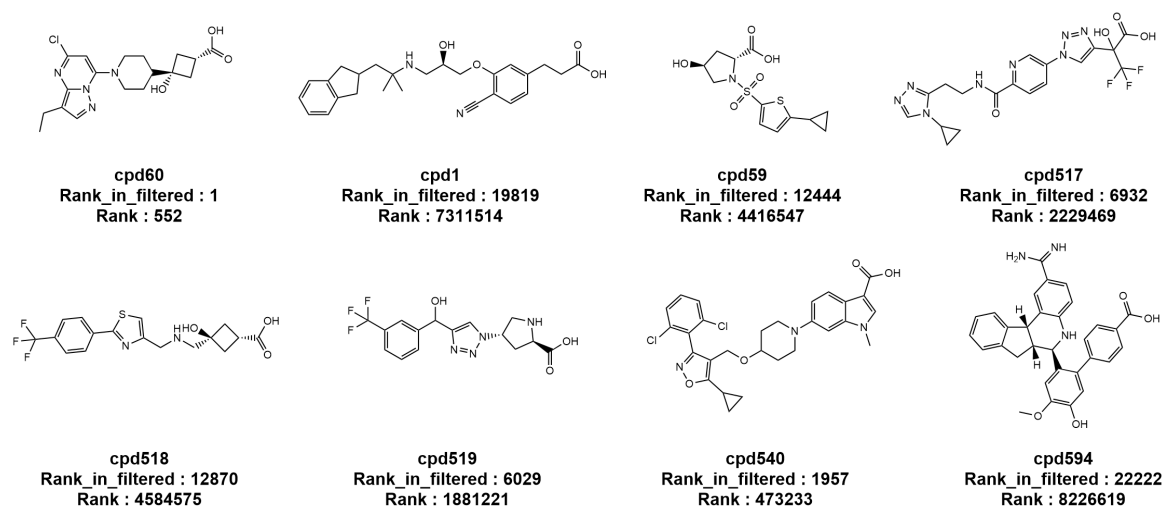

Supplementary Figure 4 Chemical structures and virtual screening rankings of the eight candidate compounds.

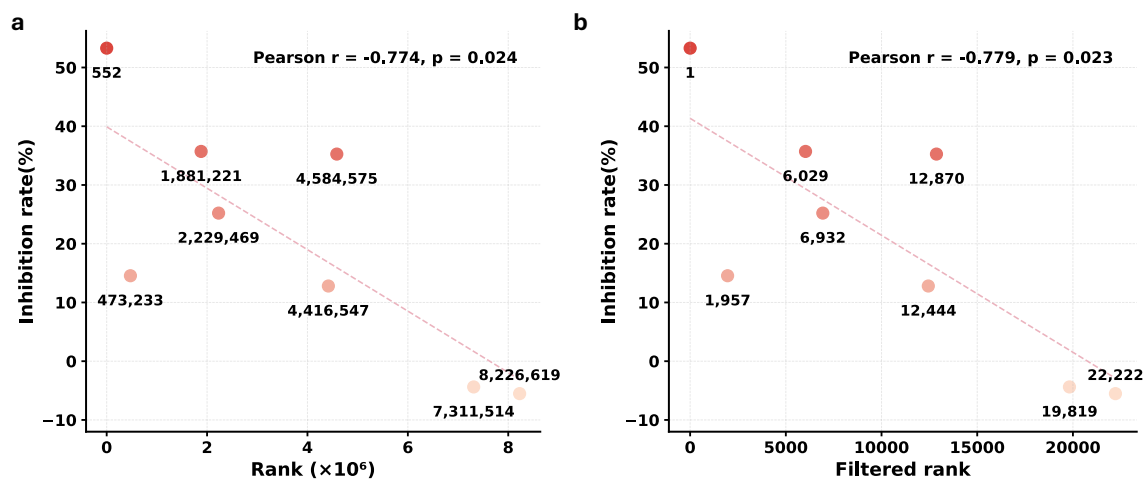

Supplementary Figure 5 Correlation between ReqVS predicted ranks and inhibition rate of HCAR1. **a** Scatter plot illustrating the relationship between the raw virtual screening rank ( $\times 10^6$ ) of the eight candidate compounds and their experimental inhibition (%). A significant negative correlation is observed, with a Pearson  $r = -0.774$ ,  $p = 0.024$ . **b** Scatter plot displaying the relationship between the candidate compounds' inhibition rate and their filtered rank after applying expert-guided structural constraints. The correlation is maintained with Pearson  $r = -0.779$ ,  $p = 0.023$ .

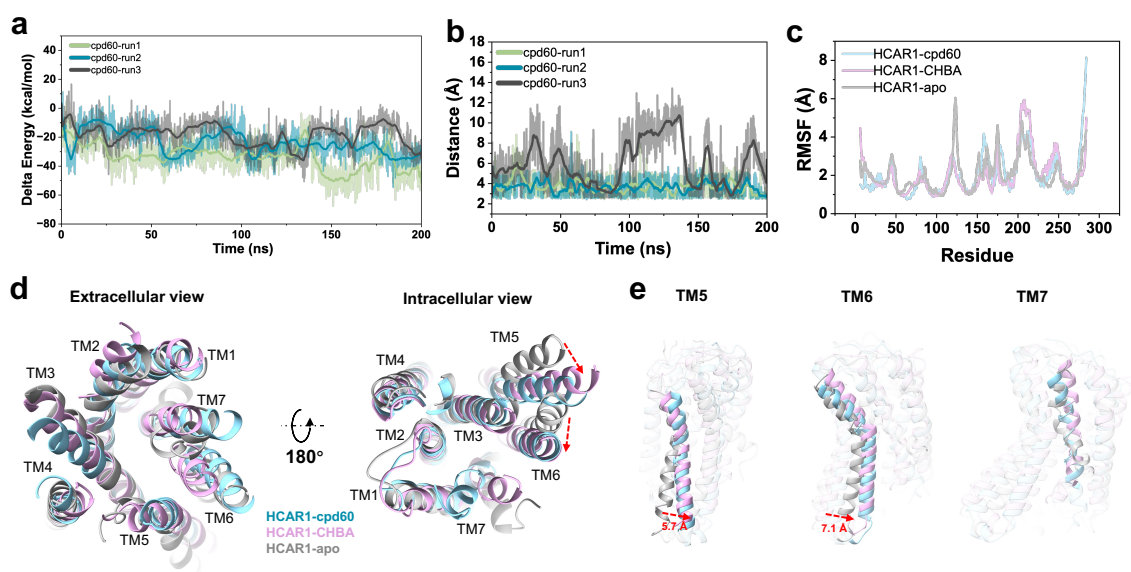

**Supplementary Figure 6 Additional MD analyses of the cpd60-HCAR1, related to Figure 8.** **a** Binding free energy of the cpd60-HCAR1 complex during three independent MD simulations. **b** Distance between the chlorine atom of cpd60 and the OE2 atom of Glu171. **c** RMSF of HCAR1 in the cpd60-bound, CHBA-bound, and apo states. **d** Structural superposition of apo-, CHBA-bound, and cpd60-bound HCAR1 conformations at 100 ns after alignment to the TM1-4 core, shown from extracellular and intracellular views. **e** Comparison of the conformational changes of TM5-TM7 among apo-, CHBA-bound, and cpd60-bound HCAR1 at 100 ns.

We propose the following proposition to derive the approximation error bound when using sequence-based entropy as a practical **surrogate** for interaction uncertainty, i.e.,

$$I(Y; S \mid s_t, s_c) \approx H(Y \mid s_t, s_c).$$

**Proposition 1** (Surrogate Approximation Error) *The approximation error of using sequence-based entropy as a surrogate for interaction uncertainty satisfies*

$$H(Y \mid s_t, s_c) - I(Y; S \mid s_t, s_c) = H(Y \mid S). \quad (1)$$

Therefore, the approximation error is bounded by

$$0 \leq H(Y \mid s_t, s_c) - I(Y; S \mid s_t, s_c) = H(Y \mid S) \leq H(Y). \quad (2)$$

Under the assumption that  $Y \in \{0, 1\}$ , the entropy of a binary random variable is bounded by

$$H(Y) \leq \log_2 2 = 1. \quad (3)$$

Therefore, the surrogate approximation error satisfies

$$0 \leq H(Y \mid s_t, s_c) - I(Y; S \mid s_t, s_c) \leq 1. \quad (4)$$

This result shows that the worst-case approximation error is bounded by one bit, which corresponds to the maximum uncertainty of a binary interaction outcome.

## References

- [1] Nguyen, T. *et al.* Graphdta: predicting drug–target binding affinity with graph neural networks. *Bioinformatics* **37**, 1140–1147 (2021).
- [2] Yang, Z., Zhong, W., Zhao, L. & Chen, C. Y.-C. Mgraphdta: deep multiscale graph neural network for explainable drug–target binding affinity prediction. *Chemical science* **13**, 816–833 (2022).
- [3] Koh, H. Y., Nguyen, A. T., Pan, S., May, L. T. & Webb, G. I. Physicochemical graph neural network for learning protein–ligand interaction fingerprints from sequence data. *Nature Machine Intelligence* **6**, 673–687 (2024).
- [4] Shah, P. M. *et al.* Deepdtagen: a multitask deep learning framework for drug-target affinity prediction and target-aware drugs generation. *Nature Communications* **16**, 5021 (2025).
- [5] Bai, P., Miljković, F., John, B. & Lu, H. Interpretable bilinear attention network with domain adaptation improves drug–target prediction. *Nature Machine Intelligence* **5**, 126–136 (2023).
- [6] Bian, J., Zhang, X., Zhang, X., Xu, D. & Wang, G. Mcanet: shared-weight-based multihead-crossattention network for drug–target interaction prediction. *Briefings in Bioinformatics* **24**, bbad082 (2023).
- [7] Chen, G. *et al.* Hitscreen: A sequence-based drug virtual screening approach using data augmentation and protein language models. *Journal of Chemical Information and Modeling* **65**, 10152–10166 (2025).
- [8] Zhao, Q. *et al.* Coldstartcpi: Induced-fit theory-guided dti predictive model with improved generalization performance. *Nature Communications* **16**, 6436 (2025).
